# Supplementary material for: Study becomes insight: Ecological learning from machine learning
Source: PubMed Central journal article supplement — Methods Ecol Evol. 2021 Aug 6;12(11):2117–28. doi: 10.1111/2041-210X.13686 (PMC9292299; doi:10.1111/2041-210x.13686), 2021-08-06
Supplement: MEE3-12-2117-s001.pdf [file MEE3-12-2117-s001.pdf]

## Supplementary

### Supplementary Figures

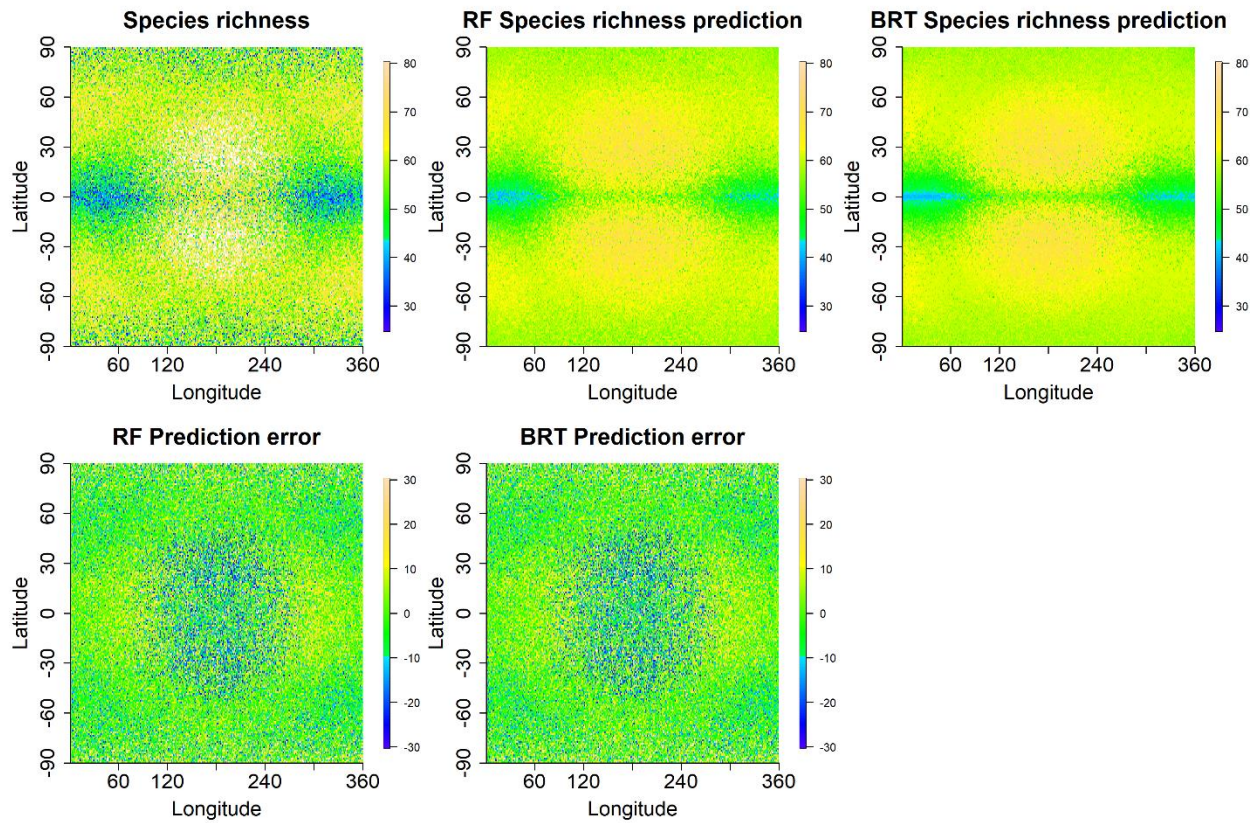

**Supplementary Figure 1.** Spatial distribution of simulated species richness, predicted species richness by random forest and boosted regression model (with 64,620 samples), and the associated prediction errors (residuals), showing spatial random error distributions (little or no spatial bias).

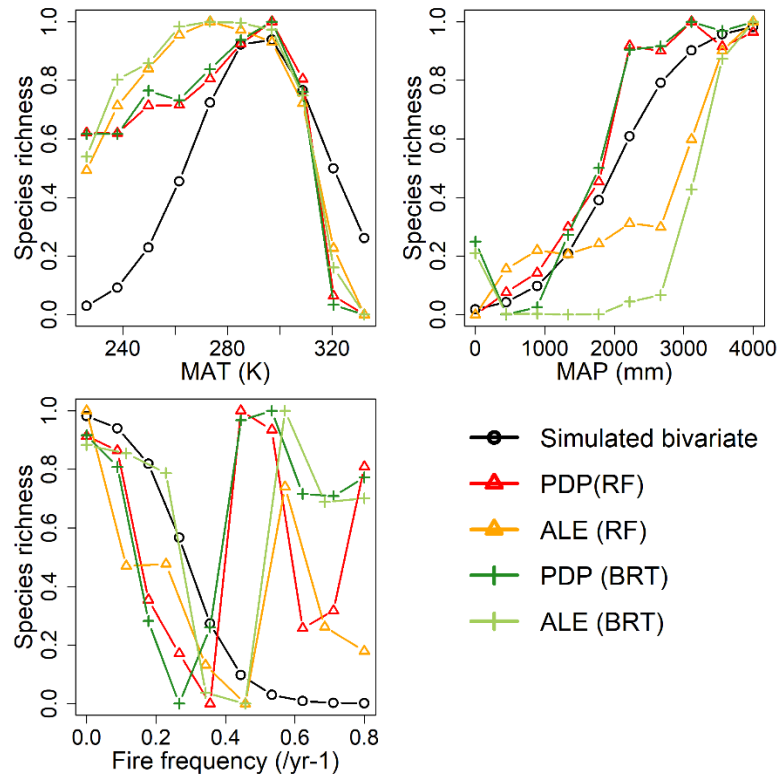

**Supplementary Figure 2.** Retrieved PDP and ALE curves (with the existence of V1 and V2) and the original functional relationship in the simulation dataset using one single 5,500 bootstrap of the dataset.

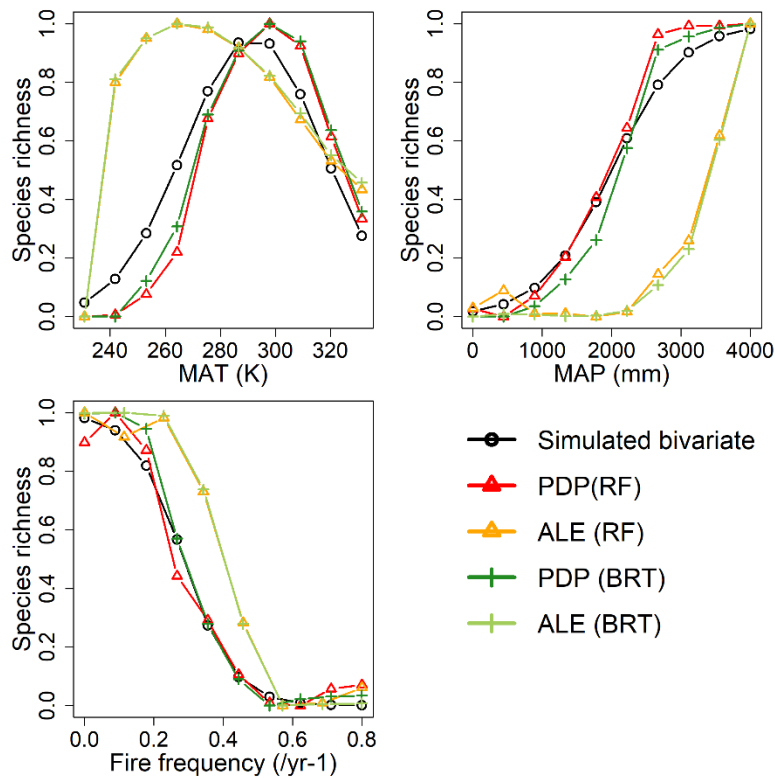

**Supplementary Figure 3.** Retrieved PDP and ALE curves (V1 and V2 omitted) and the original functional relationship in the simulation dataset for one single bootstrap with 5,500 samples.

**Supplementary Table 1.** Summary of packages and functions of interpretation methods for machine learning models in R.

| Interpretation method | R Package    | Function           | Machine learning model             | Measure confidence level |
|-----------------------|--------------|--------------------|------------------------------------|--------------------------|
| Variable importance   | randomForest | varImpPlot         | Random forest                      |                          |
|                       | rfPermute    | rp.importance      | Random forest                      | p value                  |
|                       | vita         | compVarImp         | Random forest                      |                          |
|                       | party        | varimp             | Random forest and bagging ensemble | conditional=True         |
|                       | ranger       | importance_pvalues | Random forest                      | p value                  |

|                           |              |                                                                 |                                       |                          |
|---------------------------|--------------|-----------------------------------------------------------------|---------------------------------------|--------------------------|
|                           | interpretR   | variableImportance                                              | Random forest                         |                          |
|                           | caret        | varImp                                                          | Any ML model                          |                          |
|                           | pdp          | vip                                                             | Any ML model                          |                          |
|                           | iml          | FeatureImp                                                      | Any ML model                          | Importance 0.95          |
| Partial dependence plot   | randomForest | partialPlot                                                     | Random forest                         |                          |
|                           | Mvtboost     | Plot                                                            | Tree Boosting                         |                          |
|                           | gbm          | plot.gbm                                                        | Generalized Boosted Regression Models |                          |
|                           | interpretR   | parDepPlot                                                      | Random forest                         | Predictions at quantiles |
|                           | pdp          | partial, plotPartial                                            | Any ML model                          |                          |
|                           | DALEX        | single_variable (type="pdp");<br>variable_response (type="pdp") | Any ML model                          |                          |
|                           | iml          | FeatureEffect (method="pdp")                                    | Any ML model                          |                          |
|                           | h2o          | partialPlot                                                     | Any ML model                          | Standard error           |
| Accumulated Local Effects | DALEX        | Single_variable (type="ale");<br>variable_response (type="ale") | Any ML model                          |                          |
|                           | iml          | FeatureEffect (method="ale")                                    | Any ML model                          |                          |
|                           | ALEPlot      | ALEPlot                                                         | Any ML model                          |                          |
| 3-D loess plane           | car          | scatter3d                                                       | Any ML model                          |                          |
